# Supplementary material for: Sediment trap efficiency of paddy fields at the watershed scale in a mountainous catchment in northwest Vietnam
Source: Copernicus journal article supplement (doi:10.5194/bg-13-3267-2016), 2016-06-03
Supplement: Supplementary file 1 [file bg-13-3267-2016-supplement.pdf]

Supplement of Biogeosciences, 13, 3267–3281, 2016  
<http://www.biogeosciences.net/13/3267/2016/>  
doi:10.5194/bg-13-3267-2016-supplement  
© Author(s) 2016. CC Attribution 3.0 License.

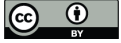

*Supplement of*

## **Sediment trap efficiency of paddy fields at the watershed scale in a mountainous catchment in northwest Vietnam**

**Johanna I. F. Slaets et al.**

*Correspondence to:* J. I. F. Slaets ([hanna.slaets@gmail.com](mailto:hanna.slaets@gmail.com))

The copyright of individual parts of the supplement might differ from the CC-BY 3.0 licence.

1 **Supplementary figure S1**

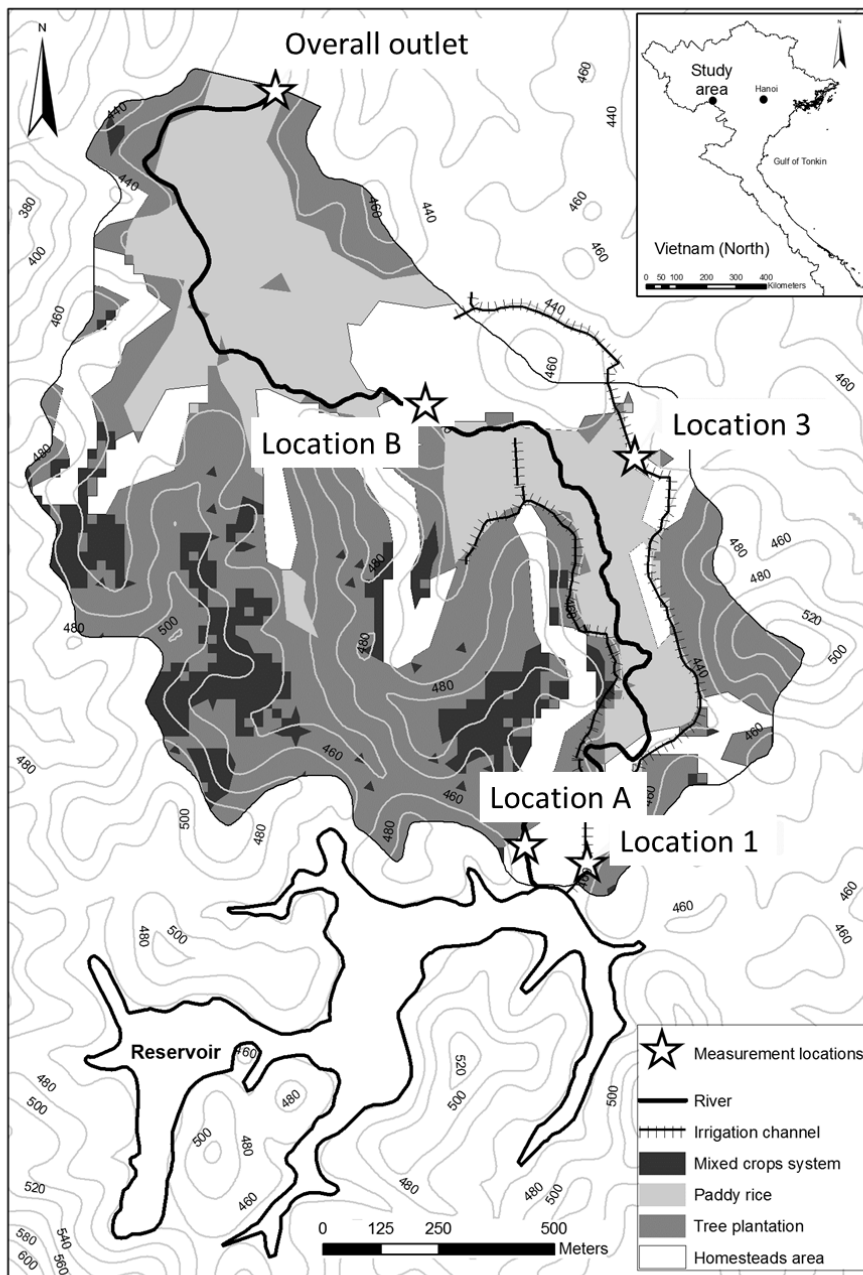

2

3 Figure S1: Map of Chieng Khoi watershed, showing land use types and measurement  
4 locations (modified after Slaets *et al.*, 2014).

5
